# Supplementary material
Source: MDPI journal article supplement (https://www.mdpi.com/2071-1050/14/15/9366)
Supplement: s1 [file s1]

## Supplementary Materials

Table S1. TSS data used in this study.

| Year | ID    | Province  | City/Country  | Longitude | Latitude | TSS (%) | Reference |
|------|-------|-----------|---------------|-----------|----------|---------|-----------|
| 1996 | 57760 | Hunan     | Lengshuijiang | 111.433   | 29.7     | 10      | [73]      |
| 1996 | 57761 | Hunan     | Xinhua        | 111.3     | 27.75    | 12.8    | [73]      |
| 1996 | 57762 | Hunan     | Lianyuan      | 111.683   | 27.7     | 11.99   | [73]      |
| 1996 | 57774 | Hunan     | Shuangfeng    | 112.1667  | 27.45    | 13.14   | [73]      |
| 1997 | 57981 | Hunan     | Zixing        | 113.4     | 25.9667  | 12.15   | [74]      |
| 1998 | 56287 | Sichuan   | Ya'an         | 103       | 29.98333 | 10.1    | [75]      |
| 1998 | 56593 | Sichuan   | Changning     | 104.917   | 28.5833  | 11      | [75]      |
| 1998 | 57981 | Hunan     | Zixing        | 113.4     | 25.9667  | 12.2    | [74]      |
| 2001 | 57253 | Hubei     | Yunxian       | 110.8167  | 32.85    | 14.8    | [76]      |
| 2001 | 57260 | Hubei     | Danjiangkou   | 111.517   | 32.5667  | 11.55   | [76]      |
| 2001 | 57355 | Hubei     | Badong        | 110.3667  | 31.03333 | 13.73   | [76]      |
| 2001 | 57358 | Hubei     | Zigui         | 110.683   | 31       | 14.34   | [76]      |
| 2001 | 57359 | Hubei     | Xingshan      | 110.767   | 31.2333  | 12.93   | [76]      |
| 2001 | 57851 | Hunan     | Xinning       | 110.85    | 26.45    | 12.5    | [76]      |
| 2001 | 57978 | Hunan     | Linwu         | 112.55    | 25.2833  | 8.8     | [76]      |
| 2001 | 57995 | Jiangxi   | Xinfeng       | 114.933   | 25.4     | 12.5    | [76]      |
| 2001 | 58907 | Jiangxi   | Anyuan        | 115.4     | 25.15    | 11.4    | [76]      |
| 2001 | 59102 | Jiangxi   | Xunwu         | 115.65    | 24.95    | 12.7    | [77]      |
| 2002 | 56485 | Sichuan   | Leibo         | 103.5833  | 28.26667 | 12.4    | [76]      |
| 2002 | 56578 | Sichuan   | Ningnan       | 102.75    | 27.0667  | 11      | [76]      |
| 2002 | 56665 | Sichuan   | Yanbian       | 101.533   | 26.9167  | 11.1    | [76]      |
| 2002 | 57253 | Hubei     | Yunxian       | 110.8167  | 32.85    | 14.66   | [76]      |
| 2002 | 57260 | Hubei     | Danjiangkou   | 111.517   | 32.5667  | 11.64   | [76]      |
| 2002 | 57348 | Chongqing | Fengjie       | 109.5333  | 31.01667 | 13      | [76]      |
| 2002 | 57355 | Hubei     | Badong        | 110.3667  | 31.03333 | 12.52   | [76]      |
| 2002 | 57358 | Hubei     | Zigui         | 110.683   | 31       | 12.44   | [76]      |
| 2002 | 57359 | Hubei     | Xingshan      | 110.767   | 31.2333  | 13.14   | [76]      |
| 2002 | 57387 | Hubei     | Jingshan      | 113.117   | 31.0167  | 12.23   | [78]      |
| 2002 | 57464 | Hubei     | Changyang     | 111.183   | 30.4667  | 11.2    | [78]      |
| 2002 | 57589 | Hubei     | Tongcheng     | 113.8     | 29.25    | 11.17   | [78]      |
| 2002 | 57851 | Hunan     | Xinning       | 110.85    | 26.45    | 12.5    | [76]      |
| 2002 | 57957 | Guangxi   | Guilin        | 110.3     | 25.31667 | 11      | [77]      |
| 2002 | 57966 | Hunan     | Ningyuan      | 111.95    | 25.6     | 11.8    | [76]      |
| 2002 | 57978 | Hunan     | Linwu         | 112.55    | 25.2833  | 11      | [76]      |
| 2002 | 57995 | Jiangxi   | Xinfeng       | 114.933   | 25.4     | 12.5    | [76]      |
| 2002 | 58500 | Hubei     | Yangxin       | 115.2     | 29.85    | 12.6    | [78]      |
| 2002 | 58823 | Fujian    | Shunchang     | 117.8     | 26.8     | 12.8    | [76]      |
| 2002 | 58824 | Fujian    | Mingxi        | 117.15    | 26.4     | 11.9    | [76]      |
| 2002 | 58907 | Jiangxi   | Anyuan        | 115.4     | 25.15    | 11.4    | [76]      |
| 2002 | 58921 | Fujian    | Yong'an       | 117.35    | 25.96667 | 13      | [76]      |
| 2002 | 59061 | Guangxi   | Fuchuan       | 111.267   | 24.8167  | 12.9    | [76]      |
| 2002 | 59065 | Guangxi   | Hezhou        | 111.5333  | 24.41667 | 11.3    | [77]      |
| 2002 | 59072 | Guangdong | Lianzhou      | 112.3833  | 24.78333 | 10.6    | [77]      |
| 2002 | 59102 | Jiangxi   | Xunwu         | 115.65    | 24.95    | 12.7    | [77]      |
| 2002 | 59106 | Guangdong | Pingyuan      | 115.9     | 24.5833  | 10.6    | [76]      |
| 2003 | 56394 | Sichuan   | Rongxian      | 104.433   | 29.45    | 11.3    | [78]      |
| 2003 | 56485 | Sichuan   | Leibo         | 103.5833  | 28.26667 | 12.4    | [76]      |
| 2003 | 56491 | Sichuan   | Yibin         | 104.55    | 28.7     | 12.2    | [78]      |
| 2003 | 56578 | Sichuan   | Ningnan       | 102.75    | 27.0667  | 11      | [76]      |
| 2003 | 56665 | Sichuan   | Yanbian       | 101.533   | 26.9167  | 11.1    | [76]      |
| 2003 | 57253 | Hubei     | Yunxian       | 110.8167  | 32.85    | 10.44   | [76]      |
| 2003 | 57260 | Hubei     | Danjiangkou   | 111.517   | 32.5667  | 11.7    | [76]      |
| 2003 | 57348 | Chongqing | Fengjie       | 109.5333  | 31.01667 | 13      | [76]      |
| 2003 | 57355 | Hubei     | Badong        | 110.3667  | 31.03333 | 11.4    | [76]      |

|      |       |           |           |          |          |       |      |
|------|-------|-----------|-----------|----------|----------|-------|------|
| 2003 | 57358 | Hubei     | Zigui     | 110.683  | 31       | 12.9  | [76] |
| 2003 | 57359 | Hubei     | Xingshan  | 110.767  | 31.2333  | 12.72 | [76] |
| 2003 | 57377 | Hubei     | Jingmen   | 112.2    | 31.05    | 9.9   | [78] |
| 2003 | 57387 | Hubei     | Jingshan  | 113.117  | 31.0167  | 8.1   | [78] |
| 2003 | 57464 | Hubei     | Changyang | 111.183  | 30.4667  | 7.6   | [78] |
| 2003 | 57466 | Hubei     | Zhijiang  | 111.75   | 30.4333  | 11.93 | [79] |
| 2003 | 57469 | Hubei     | Songzi    | 111.767  | 30.1833  | 10.2  | [78] |
| 2003 | 57477 | Hubei     | Gong'an   | 112.217  | 30.0667  | 12.1  | [79] |
| 2003 | 57483 | Hubei     | Tianmen   | 113.1667 | 30.66667 | 11.2  | [79] |
| 2003 | 57494 | Hubei     | Wuhan     | 114.1333 | 30.61667 | 14.2  | [78] |
| 2003 | 57522 | Chongqing | Fuling    | 107.4167 | 29.75    | 12.9  | [78] |
| 2003 | 57562 | Hunan     | Shimen    | 111.3667 | 29.58333 | 12.1  | [80] |
| 2003 | 57589 | Hubei     | Tongcheng | 113.8    | 29.25    | 11.03 | [78] |
| 2003 | 57649 | Hunan     | Jishou    | 109.7333 | 28.31667 | 13.35 | [78] |
| 2003 | 57851 | Hunan     | Xinning   | 110.85   | 26.45    | 12.4  | [76] |
| 2003 | 57957 | Guangxi   | Guilin    | 110.3    | 25.31667 | 12    | [77] |
| 2003 | 57966 | Hunan     | Ningyuan  | 111.95   | 25.6     | 11.8  | [76] |
| 2003 | 57978 | Hunan     | Linwu     | 112.55   | 25.2833  | 13.2  | [76] |
| 2003 | 57995 | Jiangxi   | Xinfeng   | 114.933  | 25.4     | 12.7  | [76] |
| 2003 | 58500 | Hubei     | Yangxin   | 115.2    | 29.85    | 11.78 | [78] |
| 2003 | 58501 | Hubei     | Wuxue     | 115.55   | 29.85    | 12.7  | [78] |
| 2003 | 58646 | Zhejiang  | Lishui    | 119.9167 | 28.45    | 12.7  | [78] |
| 2003 | 58656 | Zhejiang  | Yueqing   | 120.967  | 28.1167  | 13.7  | [78] |
| 2003 | 58660 | Zhejiang  | Linhai    | 121.1333 | 28.85    | 13.6  | [78] |
| 2003 | 58664 | Zhejiang  | Wenling   | 121.367  | 28.3667  | 13.1  | [78] |
| 2003 | 58737 | Fujian    | Jian'ou   | 118.3167 | 27.05    | 14.1  | [78] |
| 2003 | 58824 | Fujian    | Mingxi    | 117.15   | 26.4     | 15.4  | [76] |
| 2003 | 58837 | Fujian    | Youxi     | 118.15   | 26.1667  | 13.1  | [78] |
| 2003 | 58847 | Fujian    | Fuzhou    | 119.2833 | 26.08333 | 13    | [78] |
| 2003 | 58905 | Jiangxi   | Yudu      | 115.417  | 25.9667  | 15.1  | [78] |
| 2003 | 58907 | Jiangxi   | Anyuan    | 115.4    | 25.15    | 13.5  | [76] |
| 2003 | 58921 | Fujian    | Yong'an   | 117.35   | 25.96667 | 13.4  | [76] |
| 2003 | 58927 | Fujian    | Longyan   | 117.0333 | 25.1     | 14    | [78] |
| 2003 | 58934 | Fujian    | Yongchun  | 118.267  | 25.3333  | 11.8  | [78] |
| 2003 | 58942 | Fujian    | Fuqing    | 119.383  | 25.7167  | 12.6  | [78] |
| 2003 | 59065 | Guangxi   | Hezhou    | 111.5333 | 24.41667 | 13.8  | [77] |
| 2003 | 59091 | Jiangxi   | Quannan   | 114.533  | 24.75    | 13.8  | [78] |
| 2003 | 59124 | Fujian    | Nanjing   | 117.367  | 24.5167  | 12.8  | [78] |
| 2003 | 59126 | Fujian    | Zhangzhou | 117.65   | 24.5     | 14.7  | [78] |
| 2010 | 57957 | Guangxi   | Guilin    | 110.3    | 25.31667 | 12    | [77] |
| 2011 | 57957 | Guangxi   | Guilin    | 110.3    | 25.31667 | 14.8  | [77] |
| 2012 | 56297 | Sichuan   | Renshou   | 104.15   | 30.0167  | 10.84 | [81] |
| 2012 | 56485 | Sichuan   | Leibo     | 103.5833 | 28.26667 | 10.49 | [76] |
| 2012 | 56879 | Yunnan    | Huaning   | 102.917  | 24.2     | 11.3  | [81] |
| 2012 | 57348 | Chongqing | Fengjie   | 109.5333 | 31.01667 | 12.55 | [76] |
| 2012 | 57349 | Chongqing | Wushan    | 109.867  | 31.0667  | 12.15 | [81] |
| 2012 | 57416 | Sichuan   | Linshui   | 106.933  | 30.3333  | 11.72 | [81] |
| 2012 | 57417 | Sichuan   | Wusheng   | 106.283  | 30.35    | 10.94 | [81] |
| 2012 | 57511 | Chongqing | Beibei    | 106.45   | 29.85    | 11.7  | [81] |
| 2012 | 57840 | Guizhou   | Tianzhu   | 109.2    | 26.9     | 10.5  | [82] |
| 2012 | 57844 | Guizhou   | Jinping   | 109.183  | 26.6833  | 11.9  | [82] |
| 2012 | 57916 | Guizhou   | Luodian   | 106.7667 | 25.43333 | 11.45 | [82] |
| 2012 | 57926 | Guizhou   | Libo      | 107.883  | 25.4167  | 10.2  | [82] |
| 2012 | 57932 | Guizhou   | Rongjiang | 108.5333 | 25.96667 | 10.9  | [82] |
| 2012 | 57936 | Guizhou   | Congjiang | 108.9    | 25.5833  | 12.2  | [82] |
| 2012 | 57957 | Guangxi   | Guilin    | 110.3    | 25.31667 | 14    | [77] |
| 2012 | 57960 | Guangxi   | Quanzhou  | 111.067  | 25.9333  | 13.1  | [81] |
| 2012 | 57976 | Hunan     | Yizhang   | 112.95   | 25.4167  | 13.69 | [81] |
| 2012 | 57995 | Jiangxi   | Xinfeng   | 114.933  | 25.4     | 13.19 | [76] |
| 2012 | 58660 | Zhejiang  | Linhai    | 121.1333 | 28.85    | 13.15 | [78] |

|      |       |           |           |          |          |       |      |
|------|-------|-----------|-----------|----------|----------|-------|------|
| 2012 | 58907 | Jiangxi   | Anyuan    | 115.4    | 25.15    | 12.6  | [76] |
| 2012 | 59102 | Jiangxi   | Xunwu     | 115.65   | 24.95    | 13.45 | [77] |
| 2012 | 59431 | Guangxi   | Nanning   | 108.2167 | 22.63333 | 9.2   | [83] |
| 2013 | 57995 | Jiangxi   | Xinfeng   | 114.933  | 25.4     | 13.62 | [76] |
| 2013 | 59268 | Guangdong | Yunan     | 111.533  | 23.25    | 10.6  | [84] |
| 2013 | 59471 | Guangdong | Yunfu     | 112.05   | 22.9333  | 10.6  | [84] |
| 2016 | 57637 | Guizhou   | Dejiang   | 108.117  | 28.25    | 10.9  | [85] |
| 2016 | 57732 | Guizhou   | Yinjiang  | 108.4    | 28.0167  | 10.4  | [85] |
| 2016 | 57844 | Guizhou   | Jinping   | 109.183  | 26.6833  | 11.45 | [82] |
| 2016 | 57916 | Guizhou   | Luodian   | 106.7667 | 25.43333 | 11.36 | [82] |
| 2016 | 57936 | Guizhou   | Congjiang | 108.9    | 25.5833  | 12    | [82] |

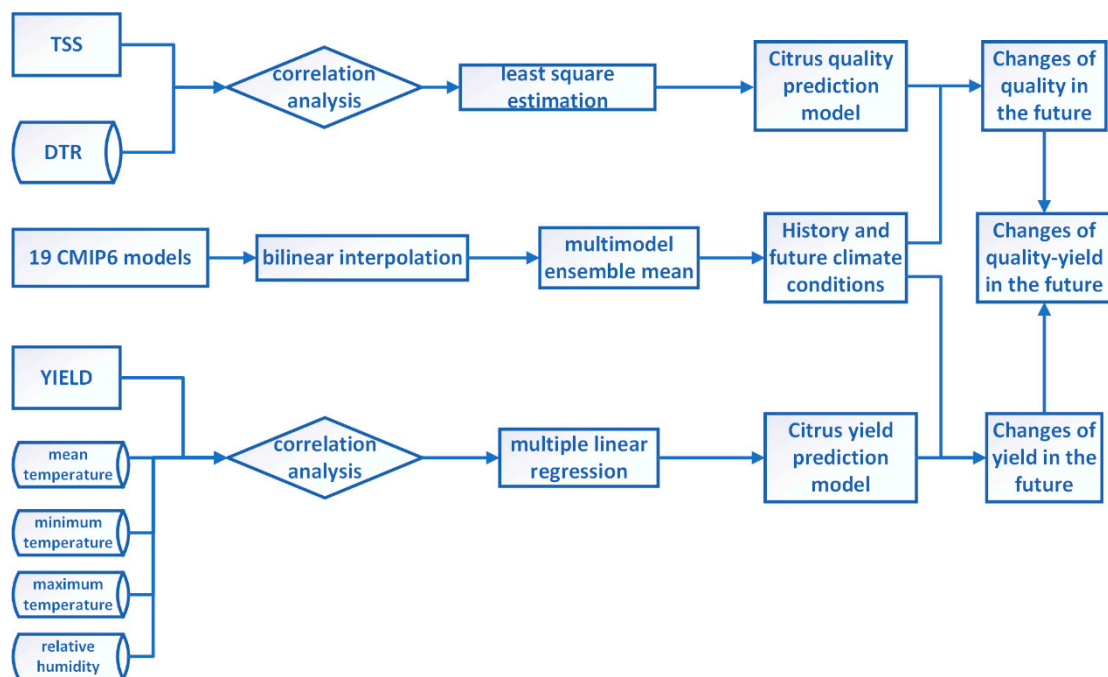

Figure S1. Flow chart.
